# Supplementary material for: Targeted Gold Nanohybrids Functionalized with Folate-Hydrophobic-Quaternized Pullulan Delivering Camptothecin for Enhancing Hydrophobic Anticancer Drug Efficacy
Source: MDPI journal article supplement (doi:10.3390/polym13162670), 2021-08-10
Supplement: s1 [file s1]

Article

# Targeted Gold Nanohybrids Functionalized with Folate-Hydrophobic-Quaternized Pullulan Delivering Camptothecin for Enhancing Hydrophobic Anticancer Drug Efficacy

Sakchai Laksee <sup>1,\*</sup>, Chamaiporn Supachettapun <sup>2</sup>, Nongnui Muangsin <sup>3</sup>, Pattra Lertsarawut <sup>1</sup>, Thitirat Rattanawongwiboon <sup>1</sup>, Phitchan Sricharoen <sup>1</sup>, Nunticha Limchoowong <sup>4</sup>, Threeraphat Chutimasakul <sup>1</sup>, Tanagorn Kwamman <sup>1</sup> and Kasinee Hemvichian <sup>1</sup>

- <sup>1</sup> Nuclear Technology Research and Development Center, Thailand Institute of Nuclear Technology (Public Organization), Nakhon Nayok 26120, Thailand; pattra@tint.or.th (P.L.); thitirat@tint.or.th (T.R.); phitchan@tint.or.th (P.S.); threeraphat@tint.or.th (T.C.); tanagorn@tint.or.th (T.K.); kasinee@tint.or.th (K.H.)
  - <sup>2</sup> Program in Petrochemistry and Polymer Science, Faculty of Science, Chulalongkorn University, Bangkok 10330, Thailand; chamai190134@gmail.com
  - <sup>3</sup> Department of Chemistry, Faculty of Science, Chulalongkorn University, Bangkok 10330, Thailand; nongnui.j@chula.ac.th
  - <sup>4</sup> Department of Chemistry, Faculty of Science, Srinakharinwirot University, Bangkok 10110, Thailand; nuntichoo@gmail.com
- \* Correspondence: sakchai@tint.or.th

**Citation:** Laksee, S.; Supachettapun, C.; Muangsin, N.; Lertsarawut, P.; Rattanawongwiboon, T.; Sricharoen, P.; Limchoowong, N.; Chutimasakul, T.; Kwamman, T.; Hemvichian, K. Targeted Gold Nanohybrids Functionalized with Folate-Hydrophobic-Quaternized Pullulan Delivering Camptothecin for Enhancing Hydrophobic Anticancer Drug Efficacy. *Polymers* **2021**, *13*, 2670. <https://doi.org/10.3390/polym13162670>

Academic Editor: Iole Venditti

Received: 15 July 2021

Accepted: 7 August 2021

Published: 10 August 2021

**Publisher's Note:** MDPI stays neutral with regard to jurisdictional claims in published maps and institutional affiliations.

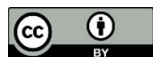

**Copyright:** © 2021 by the authors. Licensee MDPI, Basel, Switzerland. This article is an open access article distributed under the terms and conditions of the Creative Commons Attribution (CC BY) license (<http://creativecommons.org/licenses/by/4.0/>).

## Supplementary Information

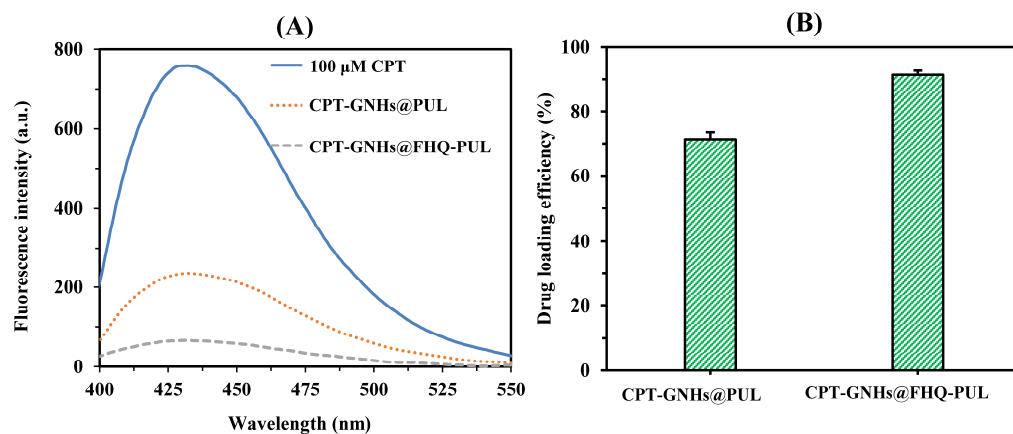

**Figure S1.** (A) Fluorescence spectra and (B) % drug loading efficiency of CPT-GNHs@FHQ-PUL compared with CPT-GNHs@PUL.

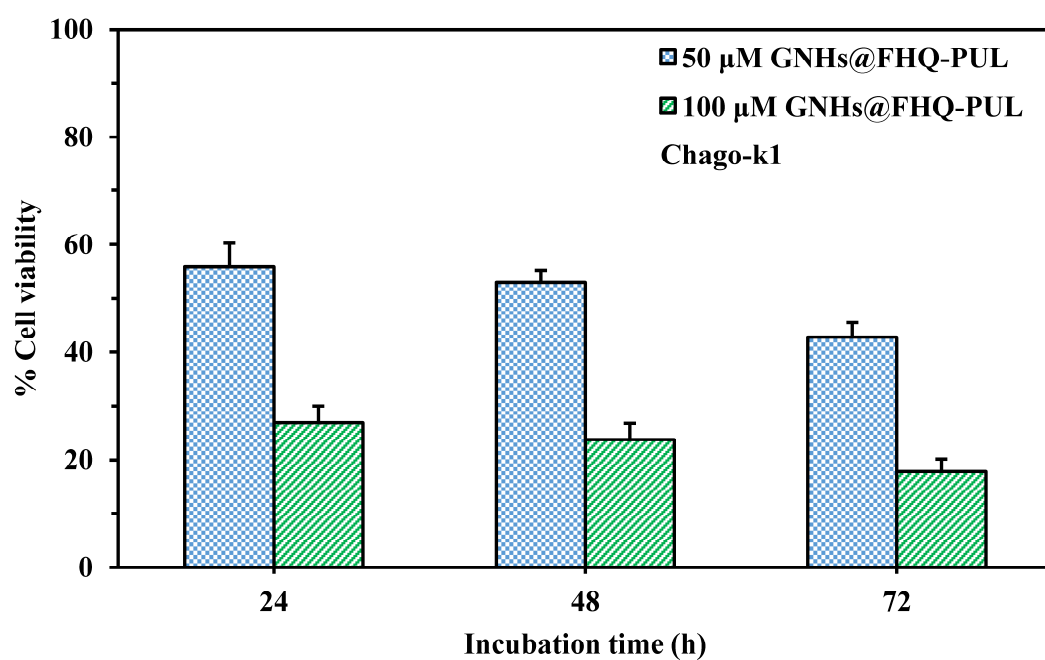

**Figure S2.** (A) % Cell viability of human lung cancer cells (Chago-k1) after incubation with GNHs@FHQ-PUL (50 and 100  $\mu\text{M}$ ) at 37  $^{\circ}\text{C}$  for 24, 48 and 72 h. Data are shown as mean  $\pm$  1SD of triplicate experiments.

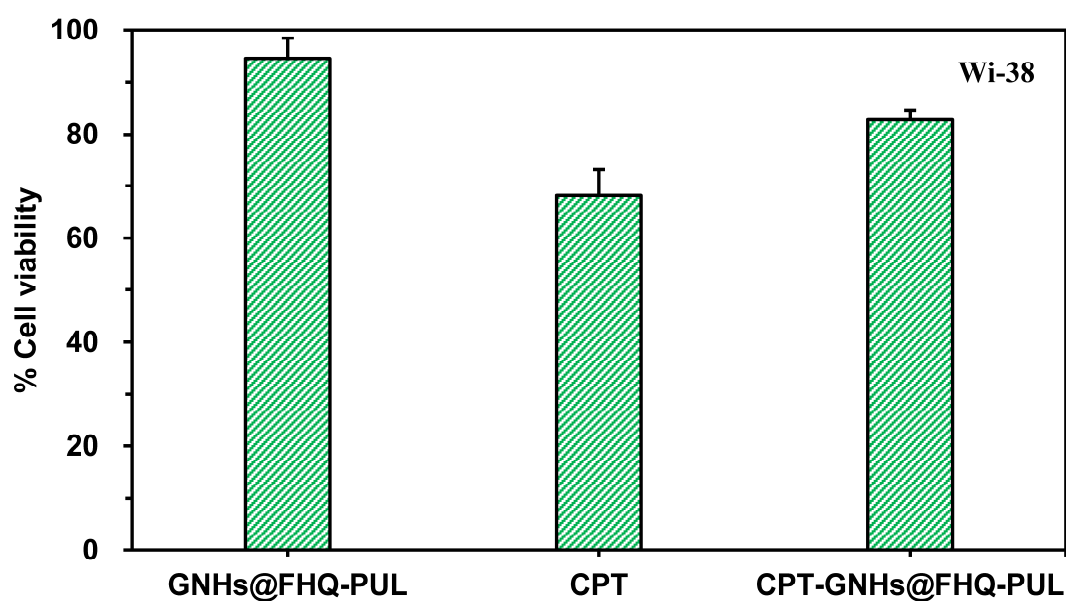

**Figure S3.** (A) % Cell viability of human lung normal cells (Wi-38) after treatment with 40  $\mu\text{M}$  GNHs@FHQ-PUL, 5  $\mu\text{M}$  CPT and 5  $\mu\text{M}$  CPT-GNHs@FHQ-PUL at 37  $^{\circ}\text{C}$  for 72 h. Data are shown as mean  $\pm$  1SD, derived from three independent trials.
